# Supplementary material for: Salvigenin, a Trimethoxylated Flavone from Achillea Wilhelmsii C. Koch, Exerts Combined Lipid-Lowering and Mitochondrial Stimulatory Effects
Source: MDPI journal article supplement (doi:10.3390/antiox10071042), 2021-06-29
Supplement: s1 [file s1]

## SUPPLEMENTARY MATERIALS

### Salvigenin, a trimethoxylated flavone from *Achillea wilhelmsii* C. Koch, Exerts Combined Lipid-Lowering and Mitochondrial Boosting Effects

Elena Serino<sup>1,#</sup>, Azam Chahardoli<sup>2,#</sup>, Nadia Badolati<sup>1</sup>, Carmina Sirignano<sup>1</sup>, Fereshteh Jalilian<sup>2</sup>, Mahdi Mojarab<sup>2</sup>, Zahra Farhangi<sup>3</sup>, Daniela Rigano<sup>1</sup>, Mariano Stornaiuolo<sup>1,\*</sup>, Yalda Shokoohinia<sup>2,4,\*</sup>, and Orazio Tagliatela-Scafati<sup>1,\*</sup>

<sup>1</sup>Department of Pharmacy, School of Medicine and Surgery, University of Naples Federico II, Via Montesano 49, 80131 Naples, Italy; [e.serino96@mail.com](mailto:e.serino96@mail.com) (E.S.); [nadia.badolati@unina.it](mailto:nadia.badolati@unina.it) (N. B.); [carmina.sirignano@unina.it](mailto:carmina.sirignano@unina.it) (C.S.); [drigano@unina.it](mailto:drigano@unina.it) (D. R.).

<sup>2</sup>Pharmaceutical Sciences Research Center, Kermanshah University of Medical Sciences, 6715847141 Kermanshah, Iran; [a.chahardoly@gmail.com](mailto:a.chahardoly@gmail.com) (A. C.); [fe.jalilian@gmail.com](mailto:fe.jalilian@gmail.com) (F. J.); [mahdi.mojarab@gmail.com](mailto:mahdi.mojarab@gmail.com) (M. M.).

<sup>3</sup>Student Research Committee, Kermanshah University of Medical Sciences, 6715847141 Kermanshah, Iran; [farhangi\\_zr@yahoo.com](mailto:farhangi_zr@yahoo.com) (Z. F.).

<sup>4</sup>Ric Scalzo Institute for Botanical Research, Southwest College of Naturopathic Medicine, Tempe, AZ 85282, USA.

\*Correspondence: [mariano.stornaiuolo@unina.it](mailto:mariano.stornaiuolo@unina.it), +39-081678117 (M.S.); [y.shokoohinia@scnm.edu](mailto:y.shokoohinia@scnm.edu), +1-480- 858-9100 (Y.S.); [scatagli@unina.it](mailto:scatagli@unina.it), +39-081678509 (O.T.S.).

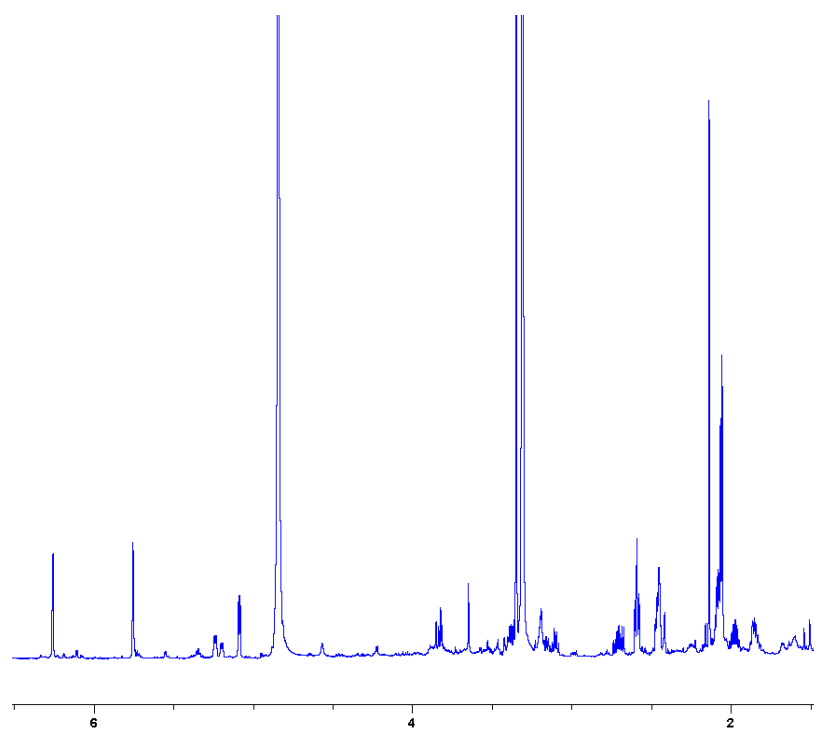

**Figure S1.**  $^1\text{H}$  NMR spectrum of wilhelmsin ( $\text{CD}_3\text{OD}$ )

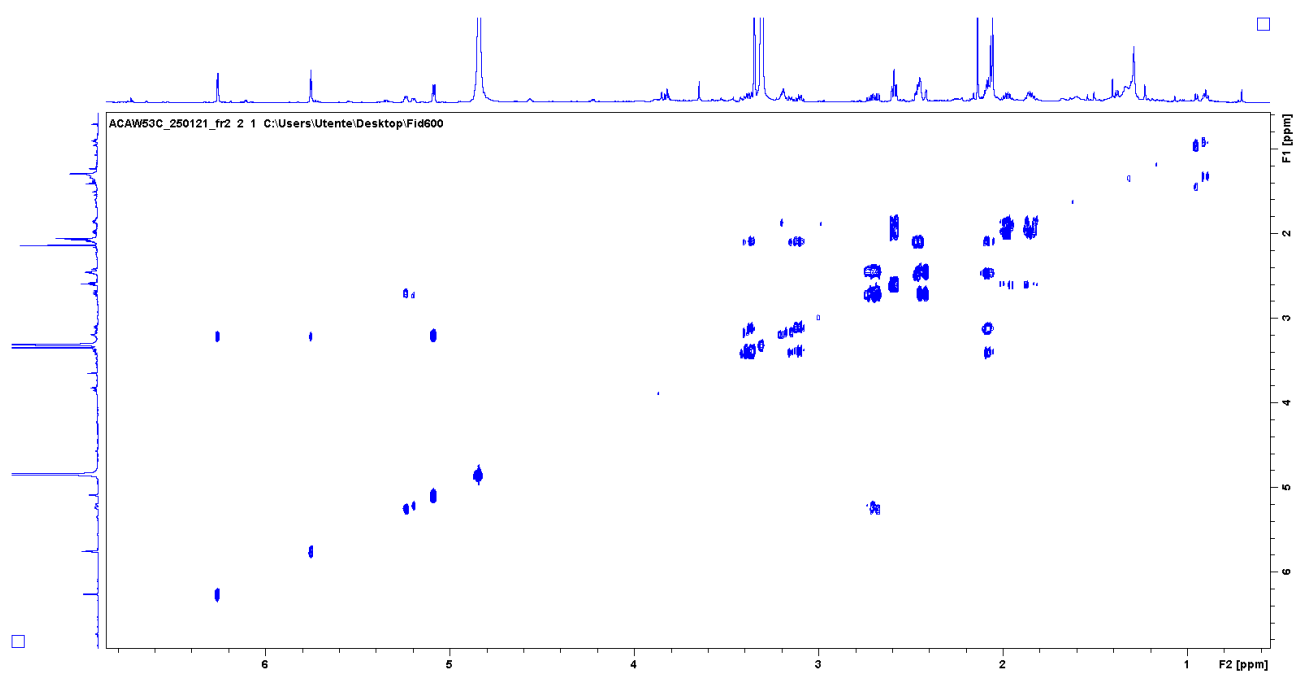

**Figure S2.** 2D COSY NMR spectrum of wilhelmsin ( $\text{CD}_3\text{OD}$ )

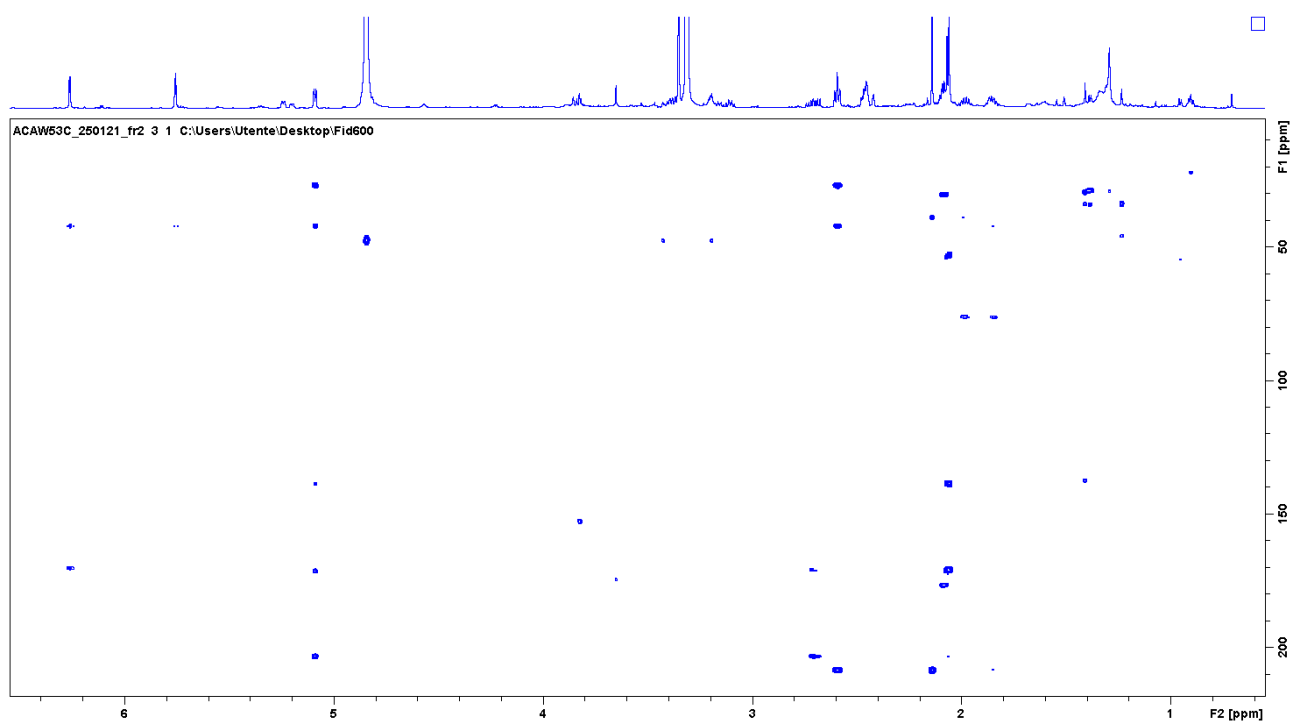

**Figure S3.** 2D HMBC NMR spectrum of wilhelmsin ( $\text{CD}_3\text{OD}$ )

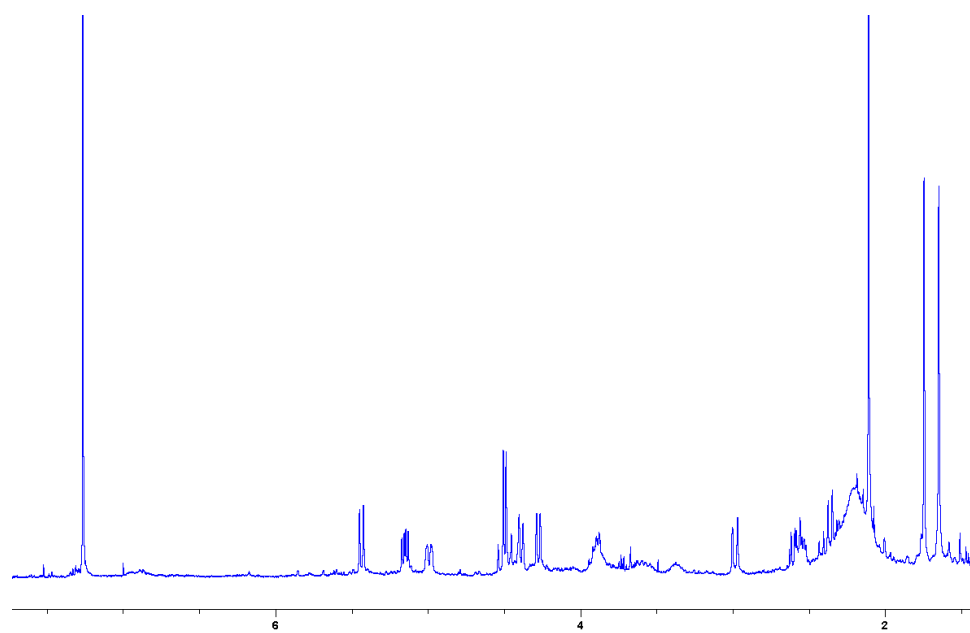

**Figure S4.**  $^1\text{H}$  NMR spectrum of wilhelmsolide ( $\text{CDCl}_3$ )

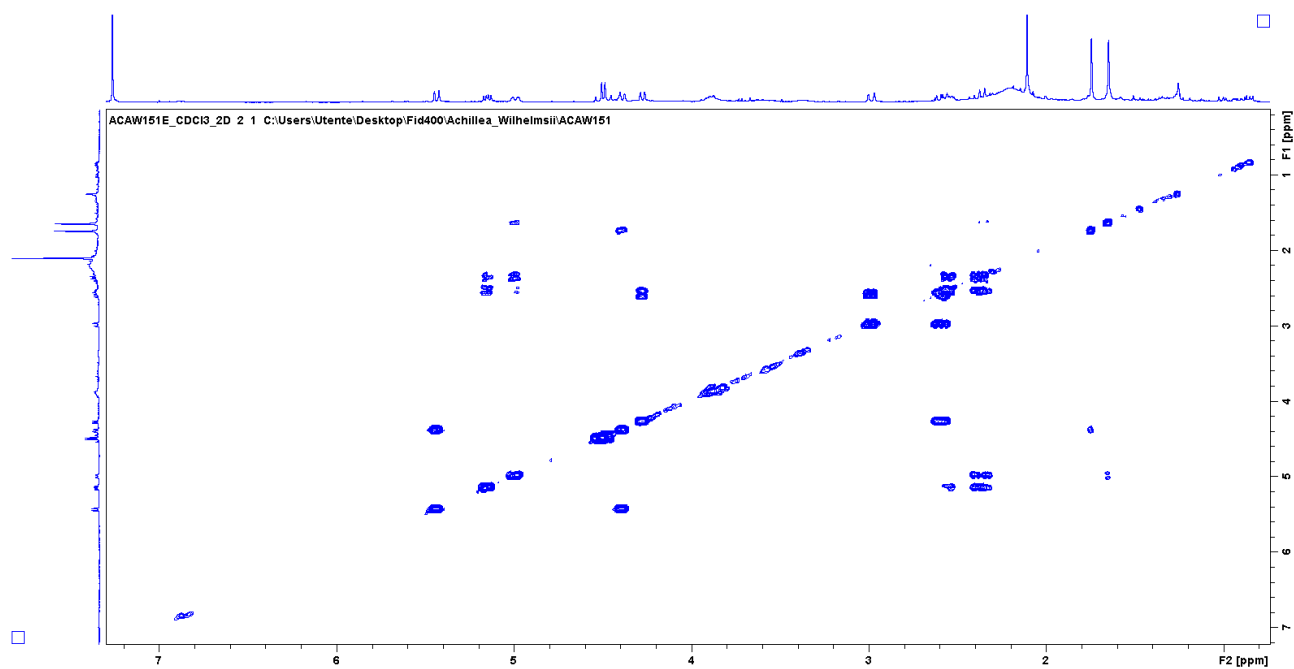

**Figure S5.** 2D COSY NMR spectrum of wilhelmsolide (CDCl<sub>3</sub>)

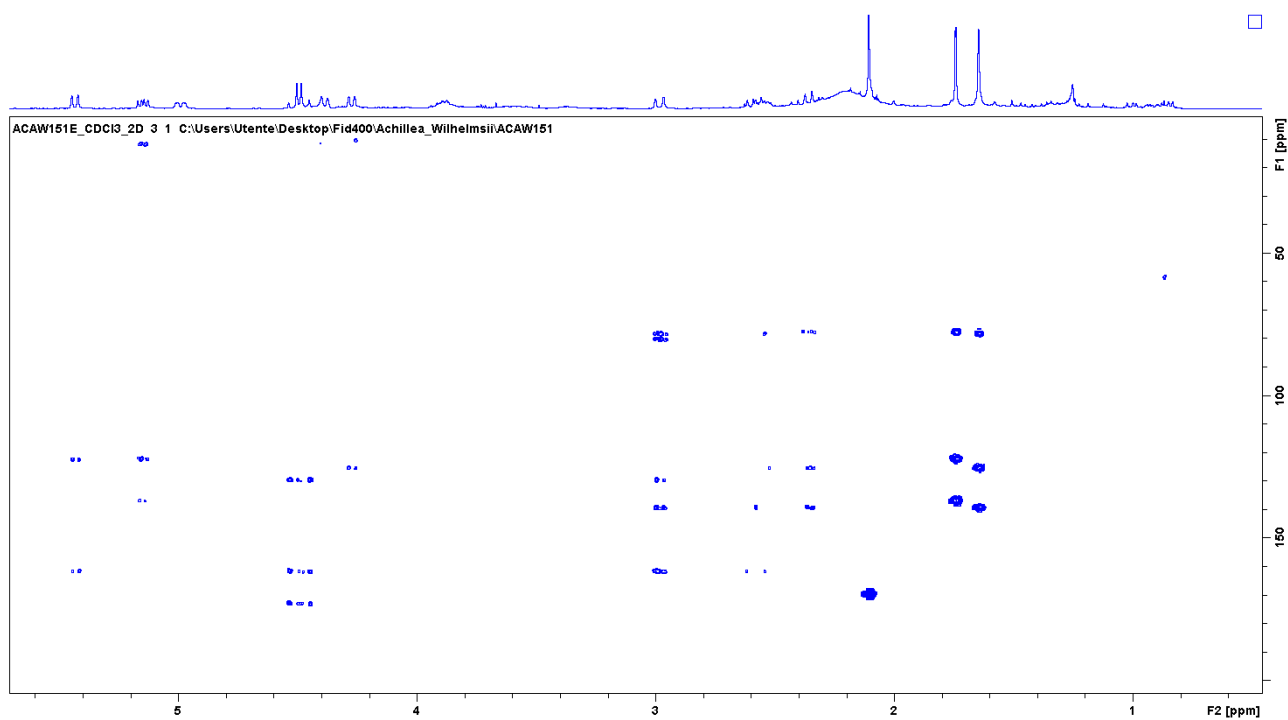

**Figure S6.** 2D HMBC NMR spectrum of wilhelmsolide (CDCl<sub>3</sub>)

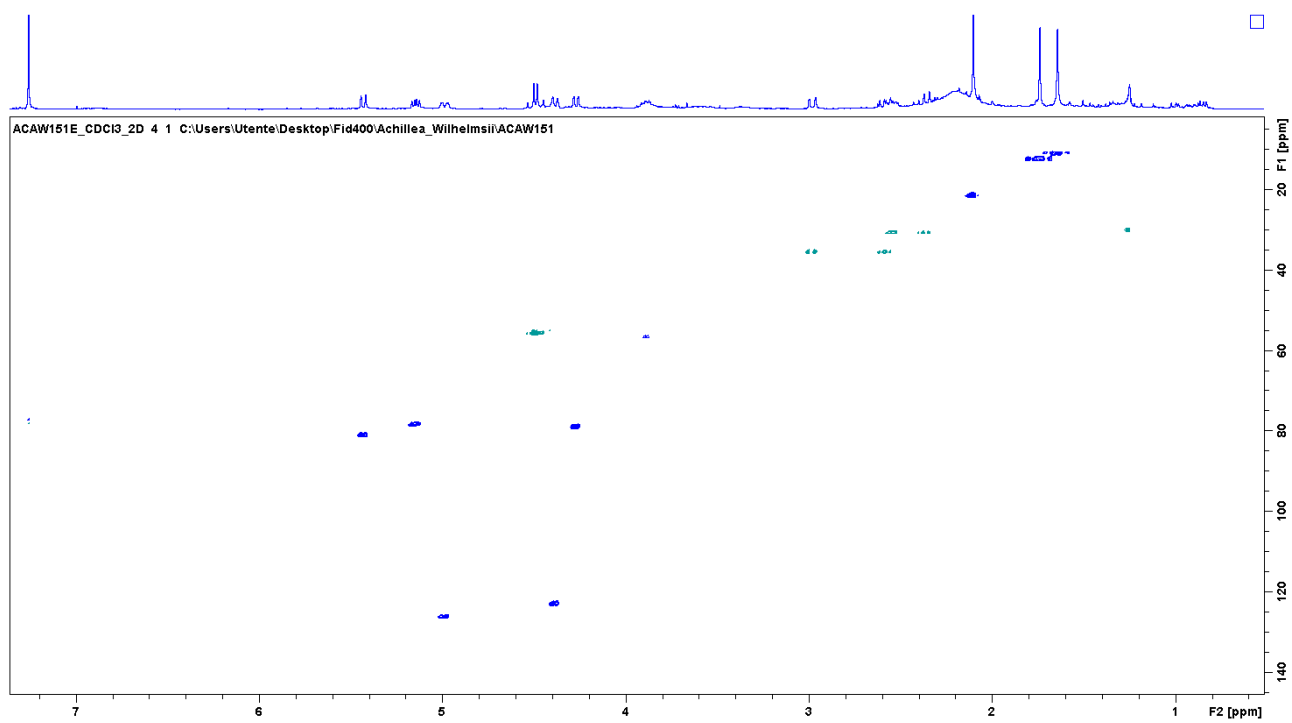

**Figure S7.** 2D HSQC NMR spectrum of wilhelmsolide ( $\text{CDCl}_3$ )
